# Supplementary material for: Key Applications and Potential Limitations of Ionic Liquid Membranes in the Gas Separation Process of CO2, CH4, N2, H2 or Mixtures of These Gases from Various Gas Streams
Source: PubMed Central journal article supplement (PMC7570638; doi:10.3390/molecules25184274), 2020-09-18
Supplement: molecules-25-04274-s001.pdf [file molecules-25-04274-s001.pdf]

Table S1[1]. The median temperature variations in different locations

| Year | Global<br>(°C) | Northern<br>Hemisphere) (°C) | Southern<br>Hemisphere (°C) | Tropics<br>(°C) |
|------|----------------|------------------------------|-----------------------------|-----------------|
| 2000 | 0.294          | 0.404                        | 0.184                       | 0.17            |
| 2001 | 0.441          | 0.558                        | 0.323                       | 0.35            |
| 2002 | 0.496          | 0.593                        | 0.398                       | 0.469           |
| 2003 | 0.505          | 0.642                        | 0.369                       | 0.507           |
| 2004 | 0.447          | 0.604                        | 0.289                       | 0.43            |
| 2005 | 0.545          | 0.724                        | 0.367                       | 0.487           |
| 2006 | 0.506          | 0.676                        | 0.336                       | 0.449           |
| 2007 | 0.491          | 0.713                        | 0.27                        | 0.365           |
| 2008 | 0.395          | 0.569                        | 0.22                        | 0.274           |
| 2009 | 0.506          | 0.594                        | 0.413                       | 0.541           |
| 2010 | 0.56           | 0.74                         | 0.379                       | 0.535           |
| 2011 | 0.425          | 0.575                        | 0.275                       | 0.243           |
| 2012 | 0.47           | 0.627                        | 0.312                       | 0.346           |
| 2013 | 0.514          | 0.674                        | 0.352                       | 0.404           |
| 2014 | 0.579          | 0.779                        | 0.381                       | 0.516           |
| 2015 | 0.763          | 1.033                        | 0.497                       | 0.737           |
| 2016 | 0.797          | 1.064                        | 0.531                       | 0.763           |
| 2017 | 0.677          | 0.922                        | 0.434                       | 0.563           |
| 2018 | 0.597          | 0.789                        | 0.405                       | 0.473           |
| 2019 | 0.736          | 0.972                        | 0.502                       | 0.656           |

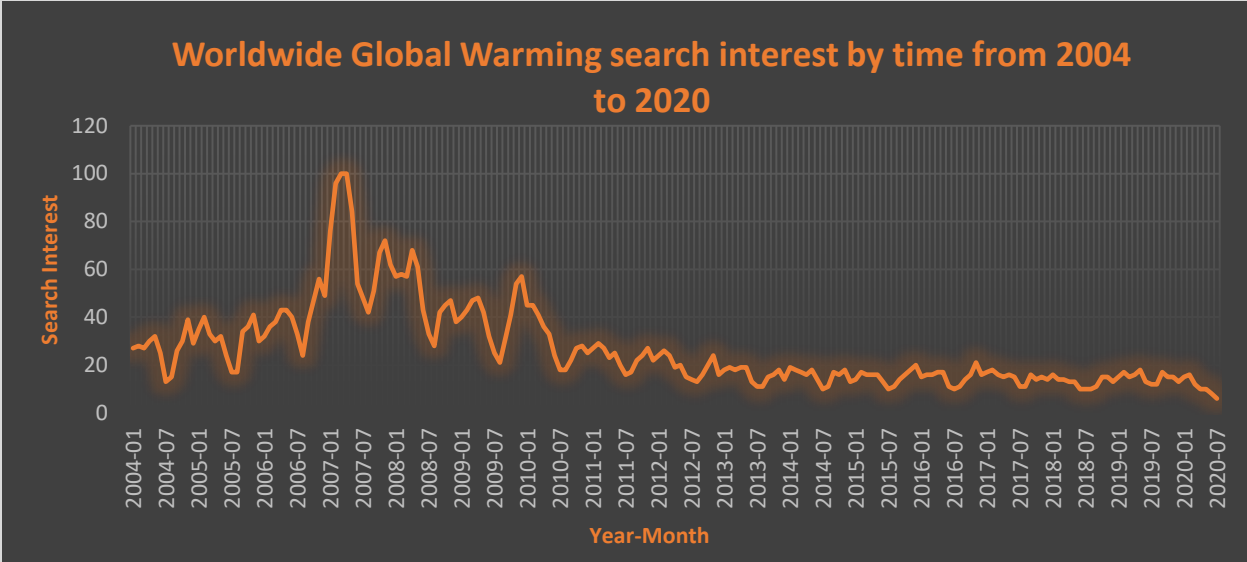

Figure S1. Worldwide search interest google trend of the Global Warming.

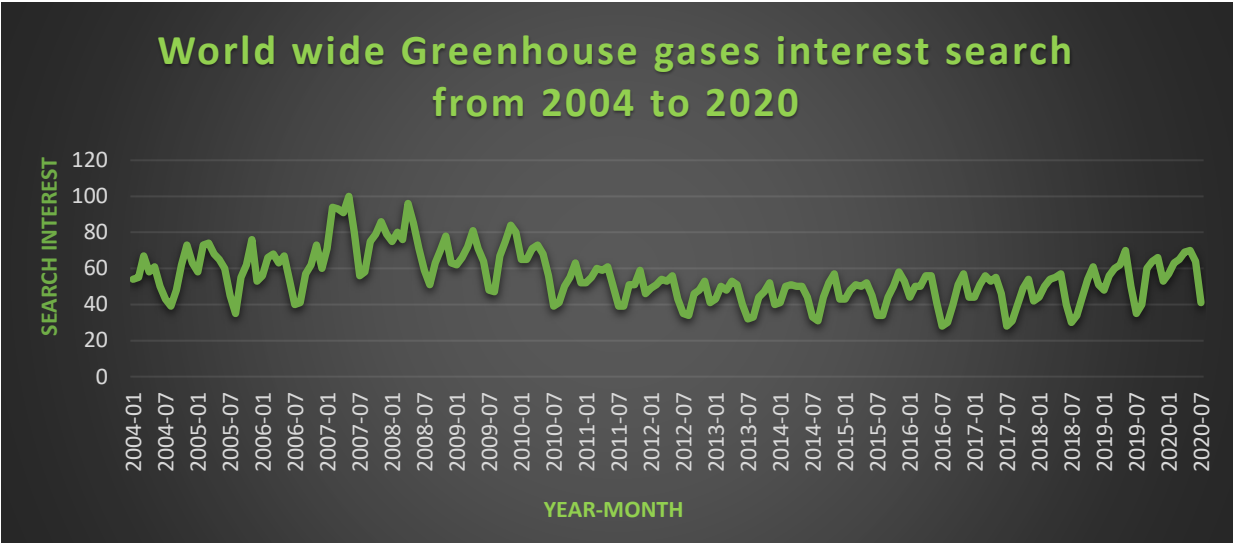

Figure S2. Worldwide search interest google trend of the Greenhouse gases.

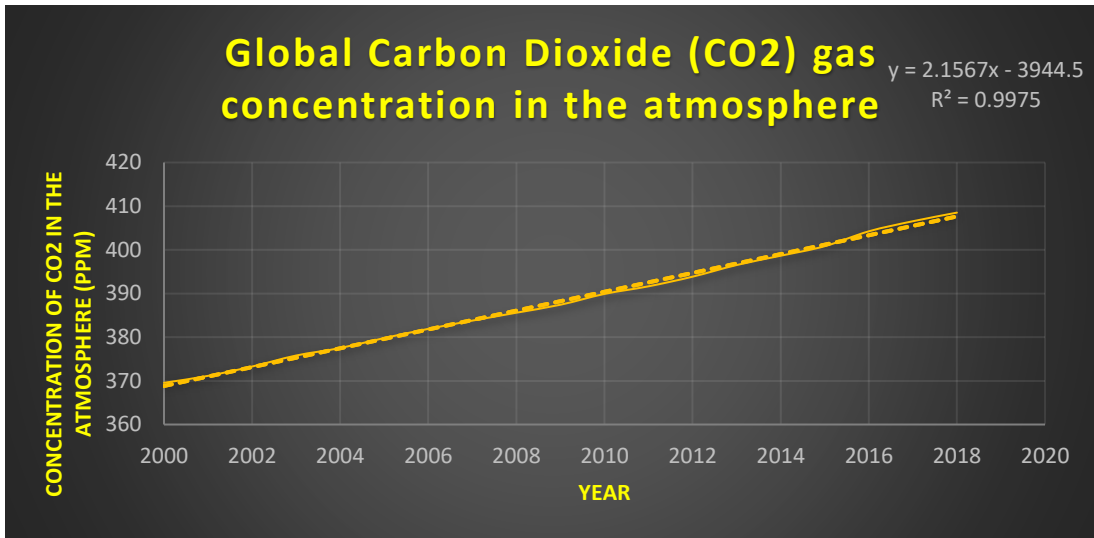

Figure S3[2]. Global CO<sub>2</sub> concentration (ppm) in the atmosphere.

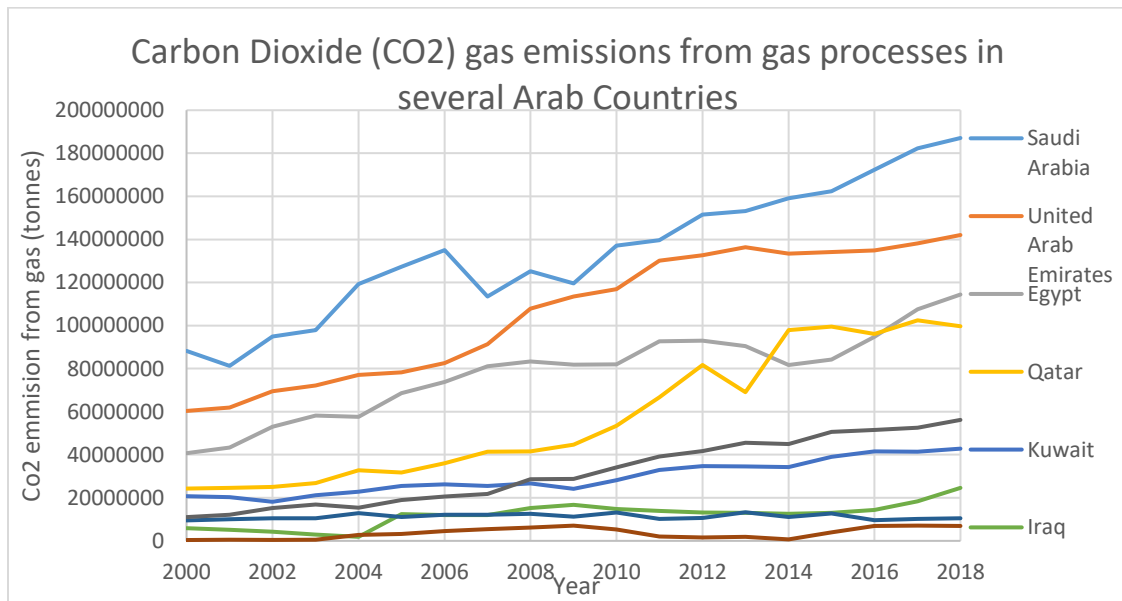

Figure S4. CO<sub>2</sub> gas emissions (tonnes) from gaseous processes in several Arab countries.

**Table S2[3].** CO<sub>2</sub> gas emissions (tonnes) from gaseous processes in several Arab countries

|      | Carbon Dioxide (CO <sub>2</sub> ) gas emissions from gas processes (tonnes) |          |          |          |          |          |          |         |          |
|------|-----------------------------------------------------------------------------|----------|----------|----------|----------|----------|----------|---------|----------|
| Year | Saudi Arabia                                                                | Emirates | Egypt    | Qatar    | Kuwait   | Iraq     | Libya    | Jordan  | Oman     |
| 2000 | 88181500                                                                    | 60331400 | 40718000 | 24286100 | 20685500 | 5888000  | 9497100  | 443340  | 11028600 |
| 2001 | 81252900                                                                    | 61928900 | 43361000 | 24609600 | 20241200 | 5158900  | 10076000 | 472550  | 12133700 |
| 2002 | 94937900                                                                    | 69525100 | 52970400 | 24992100 | 18151500 | 4297900  | 10431400 | 428690  | 15314100 |
| 2003 | 97902100                                                                    | 72211300 | 58212200 | 26791200 | 21152300 | 2916500  | 10563300 | 487310  | 16817800 |
| 2004 | 119244900                                                                   | 77073400 | 57625100 | 32836800 | 22764400 | 1868600  | 12864300 | 2737000 | 15370500 |
| 2005 | 127254400                                                                   | 78226400 | 68621600 | 31814500 | 25527100 | 12439300 | 11038900 | 3165700 | 18891600 |
| 2006 | 135000100                                                                   | 82560900 | 73833300 | 36086700 | 26234200 | 11959300 | 12050900 | 4583700 | 20624700 |
| 2007 | 113477700                                                                   | 91295900 | 81128300 | 41466700 | 25539300 | 12028200 | 12106700 | 5506100 | 21716500 |
| 2008 | 125151200                                                                   | 1.08E+08 | 83310500 | 41564400 | 26619000 | 15249600 | 12575700 | 6236100 | 28691600 |
| 2009 | 119593000                                                                   | 1.13E+08 | 81787800 | 44730100 | 24101800 | 16700500 | 11234500 | 7060500 | 28732000 |
| 2010 | 137077600                                                                   | 1.17E+08 | 81947500 | 53395500 | 28132200 | 14817200 | 13196900 | 5235900 | 34108200 |
| 2011 | 139616700                                                                   | 1.3E+08  | 92680900 | 66681100 | 32857400 | 13908500 | 10167600 | 1996900 | 39114200 |
| 2012 | 151587000                                                                   | 1.33E+08 | 92919000 | 81670100 | 34731100 | 13153800 | 10709900 | 1509300 | 41636600 |
| 2013 | 153199200                                                                   | 1.36E+08 | 90398200 | 69087700 | 34566200 | 13058200 | 13271000 | 1868600 | 45632400 |
| 2014 | 159127500                                                                   | 1.33E+08 | 81701200 | 97916400 | 34281800 | 12633200 | 11105600 | 619220  | 44967300 |
| 2015 | 162344900                                                                   | 1.34E+08 | 84151100 | 99455600 | 39065600 | 12985500 | 12732400 | 4004800 | 50575000 |
| 2016 | 172307800                                                                   | 1.35E+08 | 94824300 | 96066400 | 41593700 | 14285900 | 9552700  | 6979900 | 51541500 |
| 2017 | 182301700                                                                   | 1.38E+08 | 1.07E+08 | 1.02E+08 | 41353000 | 18386400 | 10128100 | 7086600 | 52531600 |
| 2018 | 187089100                                                                   | 1.42E+08 | 1.14E+08 | 99599100 | 42829100 | 24613500 | 10558900 | 6883700 | 56177600 |

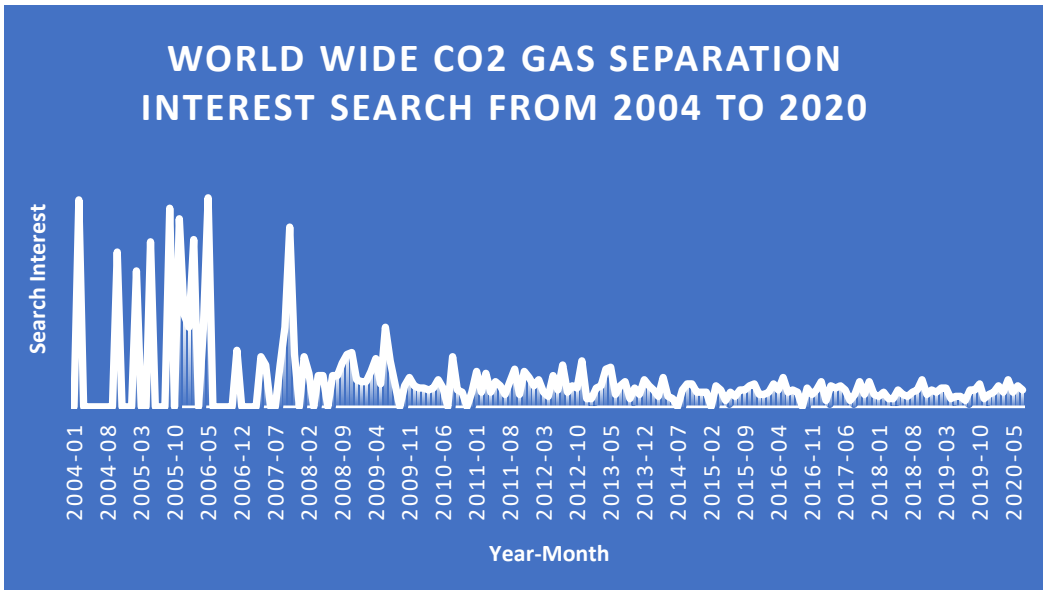

Figure S5. Worldwide search interest trend of the Carbon Dioxide (CO<sub>2</sub>) gas separation in Google

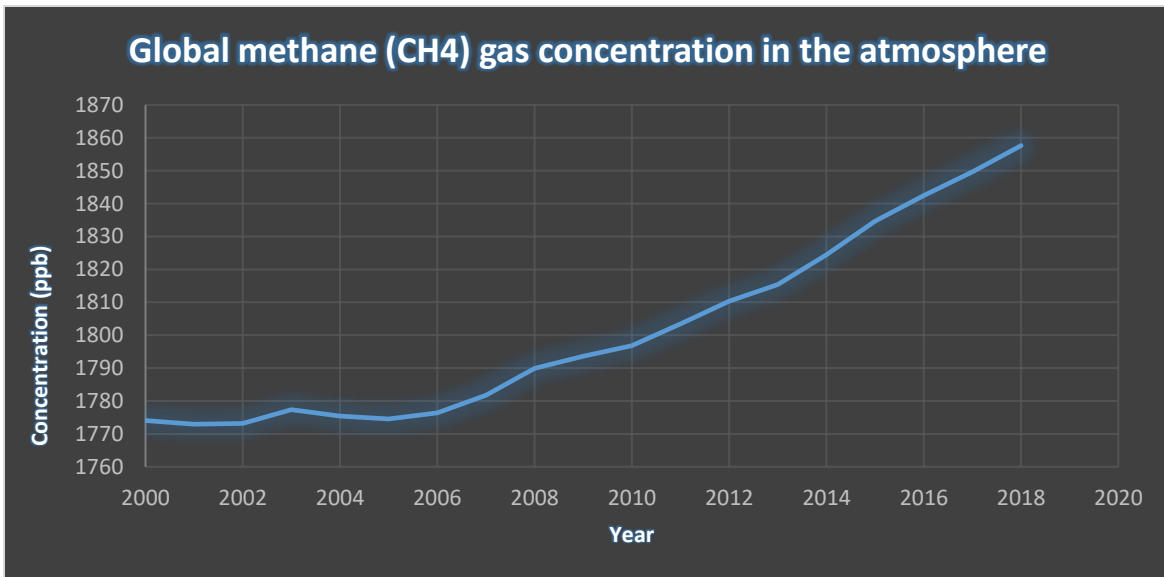

Figure S6[4]. Global methane (CH<sub>4</sub>) gas concentration in the atmosphere (ppb).

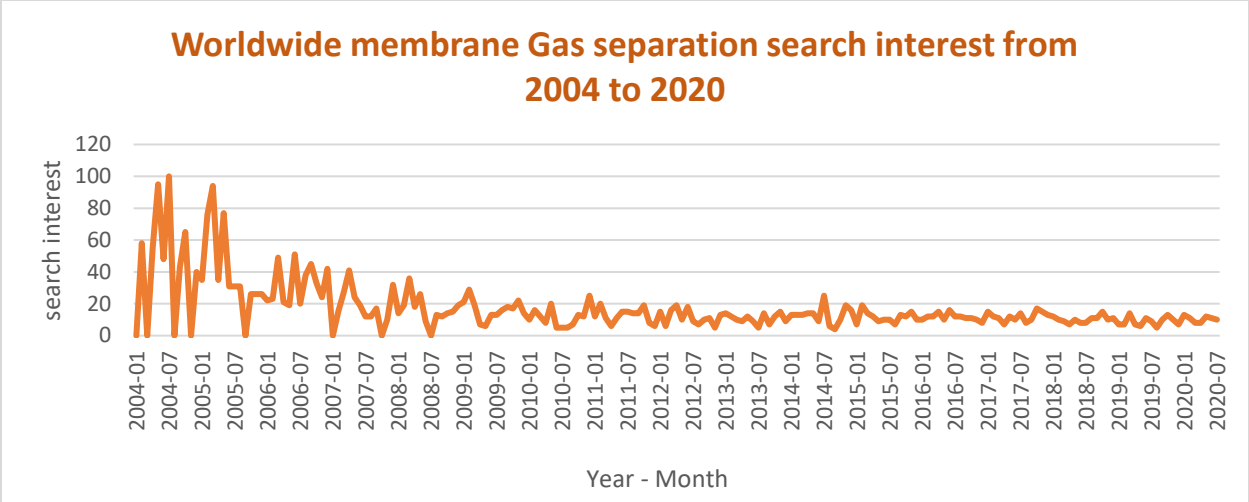

Figure S7. Worldwide membrane gas separation search interest

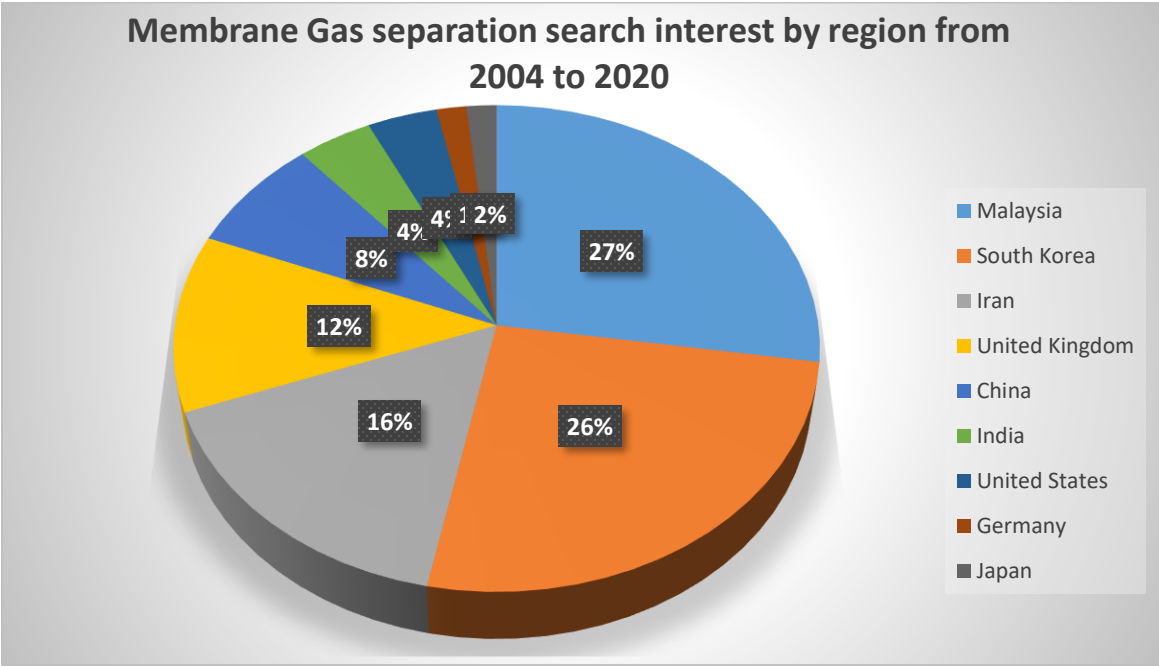

Figure S8. Membrane gas separation interest by region

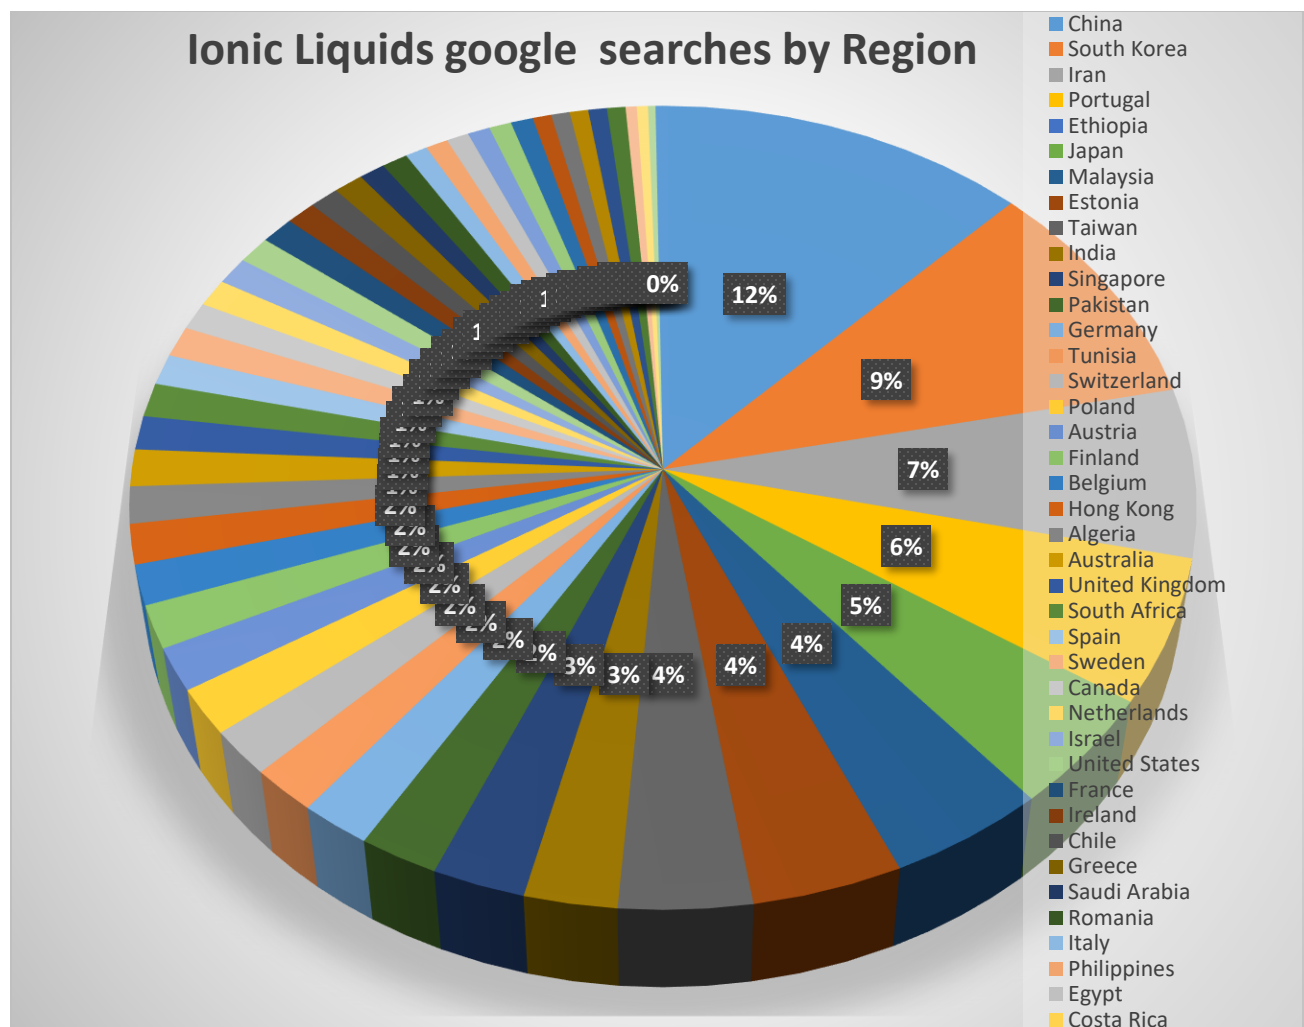

Figure S9. Ionic Liquids google trend search by regions

## References

---

1. Morice, C.P.; Kennedy, J.J.; Rayner, N.A.; Jones, P.D. Quantifying uncertainties in global and regional temperature change using an ensemble of observational estimates: The HadCRUT4 data set. *Journal of Geophysical Research: Atmospheres* **2012**, *117*, doi:10.1029/2011JD017187.
2. Tans, P.; Ralph Keeling. Trends in Atmospheric Carbon Dioxide. Available online: <https://www.esrl.noaa.gov/gmd/ccgg/trends/data.html> (accessed on 29/August).
3. Friedlingstein, P.; Jones, M.W.; O'Sullivan, M.; Andrew, R.M.; Hauck, J.; Peters, G.P.; Peters, W.; Pongratz, J.; Sitch, S.; Le Quéré, C., et al. Global Carbon Budget 2019. *Earth Syst. Sci. Data* **2019**, *11*, 1783-1838, doi:10.5194/essd-11-1783-2019.
4. Dlugokencky, E. Trends in Atmospheric Methane. Available online: [www.esrl.noaa.gov/gmd/ccgg/trends\\_ch4/](http://www.esrl.noaa.gov/gmd/ccgg/trends_ch4/) (accessed on 29/August).
